# Supplementary material for: Intellectual disability and COVID-19: A bibliometric review
Source: Front Psychiatry. 2022 Nov 9;13:1052929. doi: 10.3389/fpsyt.2022.1052929 (PMC9681827; doi:10.3389/fpsyt.2022.1052929)
Supplement: Supplementary file 1 [file Table_1.XLSX]

## Sheet: Sheet 1
AU
